# Supplementary material for: Enhancing the efficiency of benzylamine oxidative coupling over N-doped porous carbon-supported CeO2 and ZrO2 nanoparticles
Source: Royal Society of Chemistry journal article supplement (doi:10.1039/d3nj03410k), 2023-01-01
Supplement: d3nj03410k1.pdf [file d3nj03410k1.pdf]

## Electronic Supplementary Information

**Enhancing the efficiency of benzylamine oxidative coupling over N-doped porous carbon-supported CeO<sub>2</sub> and ZrO<sub>2</sub> nanoparticles**

Jie Chen,<sup>a</sup> Mingyuan Jian,<sup>a</sup> Lei Zhuang,<sup>a</sup> Wenting Lin,<sup>a</sup> Yanghe Fu,<sup>a</sup> De-Li Chen,<sup>a</sup> Weidong Zhu,<sup>a</sup> Guihua Chen,<sup>b</sup> Fumin Zhang<sup>a\*</sup>

<sup>a</sup>Key Laboratory of the Ministry of Education for Advanced Catalysis Materials, Institute of Physical Chemistry, Zhejiang Normal University, Jinhua 321004, People's Republic of China

<sup>b</sup>School of Pharmaceutical and Material Engineering, Taizhou University, 318000 Jiaojiang People's Republic of China

**\*Corresponding Author:**

Fumin Zhang: zhangfumin@zjnu.edu.cn

## 1 Experimental

### 1.1 Chemicals

Zirconium tetrachloride ( $\text{ZrCl}_4$ , 99%) and cerium(III) nitrate hexahydrate ( $\geq 99.5\%$ ,  $\text{Ce}(\text{NO}_3)_3 \cdot 6\text{H}_2\text{O}$ ) were obtained from Meryer Chemical Technology Co., Ltd. 2-aminoterephthalic acid (99.5%), decane (98%), 4-methoxybenzylamine (98%), benzylamine (98%), 2-methylbenzylamine (98%), 3-methylbenzylamine (98%), 4-methylbenzylamine (98%), 4-tert-butylbenzylamine ( $\geq 99\%$ ), 4-fluorobenzylamine (99%), 4-chlorobenzylamine (99%), 4-bromobenzylamine (99%), aniline (99%), 3-(aminomethyl) pyridine (99%), 2-thiophenemethylamine (99%), 2-furylmethylamine (99%), 4-(trifluoromethyl)benzylamine (99%), dibenzylamine (98%), 1,2,3,4-tetrahydroisoquinoline (95%), N-isopropylbenzylamine (99%) and 1-hexylamine (99%) were purchased from Aladdin Industrial Inc. N, N-dimethylformamide, methanol, ethanol, acetone and acetic acid were supplied by Sinopharm Chemical Reagent Co., Ltd. All chemicals were used without additional purification.

### 1.2 Characterizations

Powder X-ray diffraction (XRD) patterns were obtained using a D8 Advance powder X-ray diffractometer with Cu  $K\alpha$  radiation ( $\lambda = 0.154$  nm, operation voltage = 40 kV, operation current = 40 mA) within a 2-theta range of  $5^\circ$  to  $80^\circ$ .

$\text{N}_2$  adsorption-desorption isotherm measurements were conducted using a Micromeritics ASAP 2020 apparatus at 77 K and up to 1 atm. Prior to measurement, samples were degassed under vacuum at 473 K for 15 hours. The specific surface areas in the relative pressure range of  $P/P_0 = 0.05$  to 0.30 were determined using the Brunauer-Emmet-Teller method. Pore size curves were calculated based on the adsorption isotherms using density functional theory, and the micro pore volume was calculated using the  $t$ -plot method.

Raman spectroscopy was performed using an InVia-Renishaw apparatus and a 532 nm laser source.

Scanning Electron Microscopy (SEM) and Transmission Electron Microscopy (TEM) images were acquired using a Hitachi S-41073 field emission and JEM2100F apparatus at accelerating voltages ranging from 3 to 5 kV and 200 kV, respectively.

Electron Paramagnetic Resonance (EPR) was measured at 298 K under visible light ( $\lambda > 420$  nm) conditions using a Bruker EMXplus-9.5/12 spectrometer.

The determination of Ce and Zr metal content in various samples was carried out using Inductively Coupled Plasma Atomic Emission Spectroscopy (ICP-AES) with a Thermo iCAP 7400 instrument. Samples weighing 10 mg were mixed with 3 mL sulfuric acid, 1 mL hydrogen peroxide, and 1 mL hydrofluoric acid in a 50 mL Teflon beaker. The beaker was then covered and heated on a heating plate to 393 K for 12 hours. Once the sample completely dissolved and cooled to room temperature, the resulting solution was transferred to a 50 mL volumetric flask and diluted with deionized water to a total volume of 50 mL.

X-ray photoelectron spectroscopy (XPS) was carried out on a Thermo VG ESCALAB250 with a 300 W Al K radiation. The binding energies were measured with respect to the C1s line of adventitious carbon, which has a reference energy of 284.8 eV, and the base pressure was approximately  $3 \times 10^{-9}$  mbar.

**Table S1** Elemental content and textural properties of the various catalysts.

| <b>Catalyst</b>           | <b>Ce</b><br><b>(wt.%)<sup>a</sup></b> | <b>Zr</b><br><b>(wt.%)<sup>a</sup></b> | <b>S<sub>BET</sub></b><br><b>(m<sup>2</sup>/g)<sup>b</sup></b> | <b>V<sub>total</sub></b><br><b>(cm<sup>3</sup>/g)<sup>c</sup></b> | <b>V<sub>micro</sub></b><br><b>(cm<sup>3</sup>/g)<sup>c</sup></b> |
|---------------------------|----------------------------------------|----------------------------------------|----------------------------------------------------------------|-------------------------------------------------------------------|-------------------------------------------------------------------|
| CeZr-NH <sub>2</sub> -MOF | 0.97                                   | 21.98                                  | 567.0                                                          | 0.98                                                              | 0.13                                                              |
| CeZr-NC-973               | 1.86                                   | 41.82                                  | 162.8                                                          | 0.32                                                              | 0.00                                                              |
| CeZr-NC-1073              | 1.96                                   | 41.17                                  | 189.8                                                          | 0.34                                                              | 0.03                                                              |
| CeZr-NC-1173              | 1.94                                   | 43.51                                  | 170.9                                                          | 0.35                                                              | 0.02                                                              |

<sup>a</sup>By ICP-AES analysis. <sup>b</sup>By BET method. <sup>c</sup>By *t*-plot method.

**Table S2** Cerium and oxygen content in various catalysts analyzed by XPS.

| Samples      | Ce 3d concentration (%) |         | O 1s concentration (%) |                  |                  |
|--------------|-------------------------|---------|------------------------|------------------|------------------|
|              | Ce (III)                | Ce (IV) | O <sub>Latt</sub>      | O <sub>Sur</sub> | O <sub>Ads</sub> |
| CeZr-NC-973  | 51.2                    | 48.8    | 39.3                   | 23.6             | 37.1             |
| CeZr-NC-1073 | 57.3                    | 42.7    | 41.9                   | 46.1             | 12.0             |
| CeZr-NC-1173 | 51.0                    | 49.0    | 48.6                   | 25.4             | 26.0             |

**Table S3** Optimization of reaction parameters for CeZr-NC-1073 catalyzed oxidative self-coupling of 4-methoxybenzylamine<sup>a</sup>.

| Entry           | T (K) | Solvent          | Catalyst amount (mg) | Conv. (%) <sup>b</sup> | Sel. (%) <sup>b</sup> |
|-----------------|-------|------------------|----------------------|------------------------|-----------------------|
| 1               | 343   | <i>n</i> -Decane | 30                   | 28.5                   | 100                   |
| 2               | 363   | <i>n</i> -Decane | 30                   | 44.4                   | 100                   |
| 3               | 383   | <i>n</i> -Decane | 30                   | 97.1                   | 100                   |
| 4               | 383   | Dodecane         | 30                   | 80.3                   | 100                   |
| 5               | 383   | EtOH             | 30                   | 21.7                   | 67.8                  |
| 6               | 383   | Acetonitrile     | 30                   | 34.2                   | 100                   |
| 7               | 373   | H <sub>2</sub> O | 30                   | 3.9                    | 28.1                  |
| 8               | 383   | DMF              | 30                   | 99.2                   | 35.3                  |
| 9               | 383   | Toluene          | 30                   | 64.9                   | 100                   |
| 10              | 383   | Paraxylene       | 30                   | 42.0                   | 100                   |
| 11              | 383   | <i>n</i> -Decane | 15                   | 36.3                   | 100                   |
| 12              | 383   | <i>n</i> -Decane | 25                   | 65.3                   | 100                   |
| 13              | 383   | <i>n</i> -Decane | 35                   | 97.2                   | 88.0                  |
| 14 <sup>c</sup> | 383   | <i>n</i> -Decane | 30                   | 64.9                   | 67.8                  |
| 15 <sup>d</sup> | 383   | <i>n</i> -Decane | 30                   | 74.2                   | 74.5                  |

<sup>a</sup>**Reaction conditions:** 4-Methoxybenzylamine (0.5 mmol), solvent (3 mL), O<sub>2</sub> (1 atm), 8 h.

<sup>b</sup>Determined by gas chromatography using diphenyl as the internal standard. <sup>c</sup>Under an air atmosphere. <sup>d</sup>Under a N<sub>2</sub> atmosphere.

**Table S4** Comparison of catalytic oxidative coupling of benzylamine over different catalysts.

| Entry | Catalyst                                                               | Reaction conditions                                                               | Con.<br>(%) | Sel.<br>(%) | Ref.      |
|-------|------------------------------------------------------------------------|-----------------------------------------------------------------------------------|-------------|-------------|-----------|
|       |                                                                        | Substrate/catalyst-<br>dosage/temperature/oxidant                                 |             |             |           |
| 1     | CeZr-NC-1073                                                           | 0.5 mmol/30 mg/383 K/1 atm O <sub>2</sub> /8 h                                    | 99.5        | 100.0       | This work |
| 2     | CeO <sub>2</sub> -MoO <sub>3</sub> /SiO <sub>2</sub>                   | 1 mL·h <sup>-1</sup> /300 mg/493 K/60 mL·min <sup>-1</sup><br>O <sub>2</sub> /6 h | 96.0        | 97.8        | [s1]      |
| 3     | MoO <sub>x</sub> /CeO <sub>2</sub> -ZrO <sub>2</sub>                   | 0.2 mmol/100 mg/383 K/20 mL·min <sup>-1</sup><br>O <sub>2</sub> /6 h              | 99.0        | 99.8        | [s2]      |
| 4     | Ce <sub>0.95</sub> Cu <sub>0.05</sub> O <sub>2</sub> -300              | 3 mmol/50 mg/383 K/1 atm air (0.3 mmol<br>NHPI)/48 h                              | 97.8        | 98.6        | [s3]      |
| 5     | Ce <sub>0.8</sub> Eu <sub>0.2</sub> O <sub>2-δ</sub> /SiO <sub>2</sub> | 0.2 mmol/100 mg/398 K/20 mL·min <sup>-1</sup><br>O <sub>2</sub> /7 h              | 99.0        | 99.8        | [s4]      |
| 6     | Au-CeO <sub>2</sub> -ZrO <sub>2</sub>                                  | 0.2 mmol/100 mg/403 K/20 mL·min <sup>-1</sup><br>O <sub>2</sub> /6 h              | 95.0        | 99.9        | [s5]      |
| 7     | CeMn-RO                                                                | 2 mmol/50 mg/353 K/1 atm air/8 h                                                  | 92.0        | 80.0        | [s6]      |
| 8     | α-MnO <sub>2</sub>                                                     | 0.5 mmol/10 mol%/RT/1 mmol TBHP/4<br>h                                            | 99.0        | 95.0        | [s7]      |
| 9     | NHPI/Fe(BTC)                                                           | 0.5 mL/75 mg/373 K/1 atm O <sub>2</sub> /24 h                                     | 98.0        | 90.0        | [s8]      |

**Reference**

[s1] B. G. Rao, P. Sudarsanam, B. Mallesham and B. M. Reddy, *RSC Adv.*, 2016, **6**, 95252–95262.

- [s2] A. Rangaswamy, P. Sudarsanam, B. G. Rao and B. M. Reddy, *Res. Chem. Intermed.*, 2015, **42**, 4937–4950.
- [s3] X. Huang, G. Lu, K. Zhang, J. Liu, H. Zhang, Z. Guo and J. Tao, *Appl. Surf. Sci.*, 2020, **514**, 145948.
- [s4] T. Vinodkumar, J. K. P. Kumar and B. M. Reddy, *J. Chem. Sci.*, 2021, **133**, 68.
- [s5] P. Sudarsanam, B. Mallesham, A. Rangaswamy, B. G. Rao, S. K. Bhargava and B. M. Reddy, *J. Mol. Catal. A: Chem.*, 2016, **412**, 47–55.
- [s6] C. Wu, J. Bu, W. Wang, H. Shen, Y. Cao and H. Zhang, *Ind. Eng. Chem. Res.*, 2022, **61**, 5442–5452.
- [s7] Z. Zhang, F. Wang, M. Wang, S. Xu, H. Chen, C. Zhang and J. Xu, *Green Chem.*, 2014, **16**, 2523–2527.
- [s8] A. Dhakshinamoorthy, M. Alvaro and H. Garcia, *ChemCatChem*, 2010, **2**, 1438–1443.



**Table S5** Kinetic parameters of the CeZr-NC-1073 catalyzed oxidative self-coupling reaction of 4-methoxybenzylamine.

| <b>T (K)</b> | <b><i>k</i> (min<sup>-1</sup>)</b> | <b><i>E<sub>a</sub></i> (kJ/mol)</b> |
|--------------|------------------------------------|--------------------------------------|
| 363          | $2.5 \times 10^{-3}$               |                                      |
| 373          | $4.1 \times 10^{-3}$               | $62.6 \pm 3.0$                       |
| 383          | $7.3 \times 10^{-3}$               |                                      |

**Table S6** Effect of scavenger agent on oxidation of 4-methoxybenzylamine to imine in the presence of CeZr-NC-1073<sup>a</sup>.

| Entry          | Scavenger    | Conv. (%) <sup>b</sup> | Sel. (%) <sup>b</sup> |
|----------------|--------------|------------------------|-----------------------|
| 1              | Blank        | 97.8                   | 100                   |
| 2              | benzoquinone | 96.8                   | 100                   |
| 3              | BHT          | 38.4                   | 100                   |
| 4              | TEMPO        | 75.9                   | 92.0                  |
| 5 <sup>c</sup> | Blank        | 58.0                   | 100                   |
| 6 <sup>d</sup> | Blank        | 55.4                   | 100                   |
| 7 <sup>e</sup> | Blank        | 53.7                   | 100                   |

<sup>a</sup>**Reaction conditions:** 4-Methoxybenzylamine (0.5 mmol), catalyst (30 mg), *n*-decane (3 mL), O<sub>2</sub> (1 atm), 383 K, 8 h. <sup>b</sup>Determined by gas chromatography using diphenyl as the internal standard. <sup>c</sup>2 h. <sup>d</sup>In the presence of 3 Å molecular sieve (0.15 g). <sup>e</sup>With adding H<sub>2</sub>O (1 mmol).

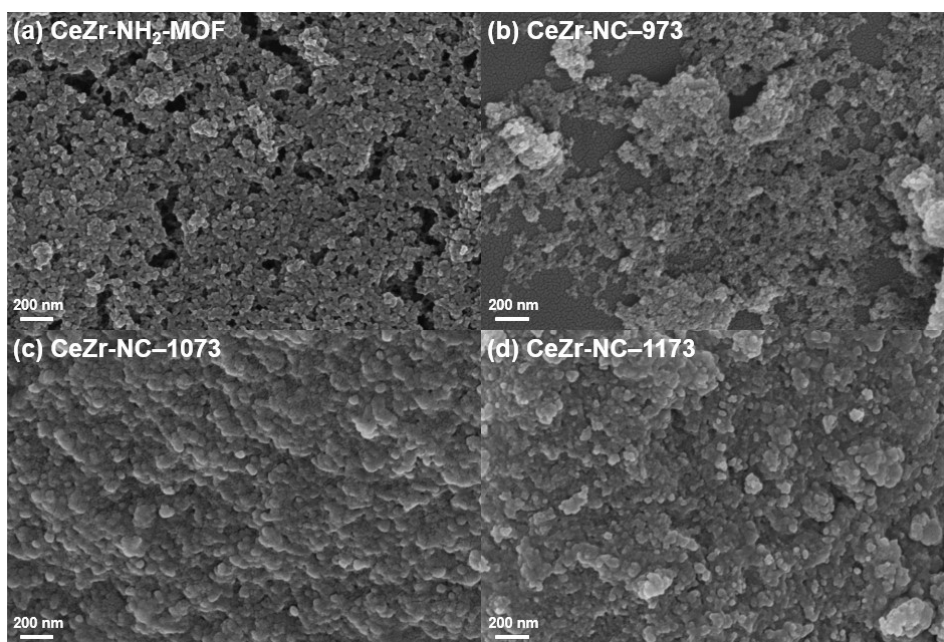

**Figure S1** SEM images of (a) CeZr-NH<sub>2</sub>-MOF, (b) CeZr-NC-973 (c) CeZr-NC-1073 and (d) CeZr-NC-1173.

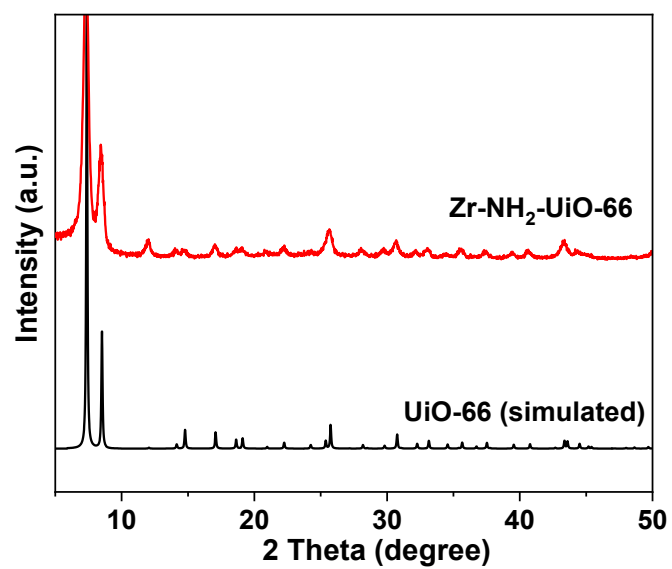

**Figure S2** XRD pattern of Zr-NH<sub>2</sub>-UiO-66.

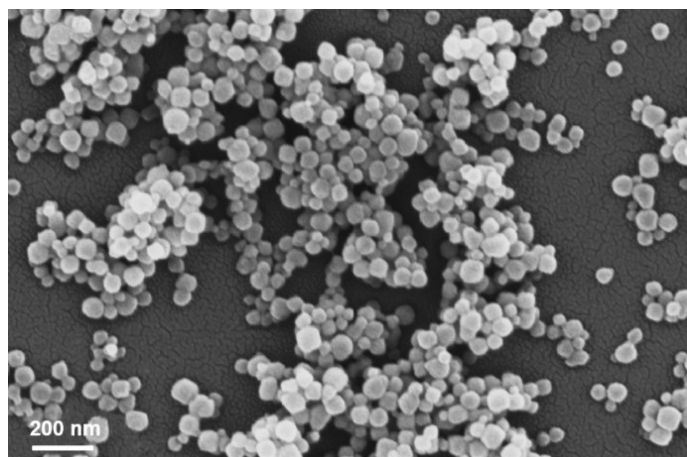

**Figure S3** SEM image of Zr-NH<sub>2</sub>-UiO-66.

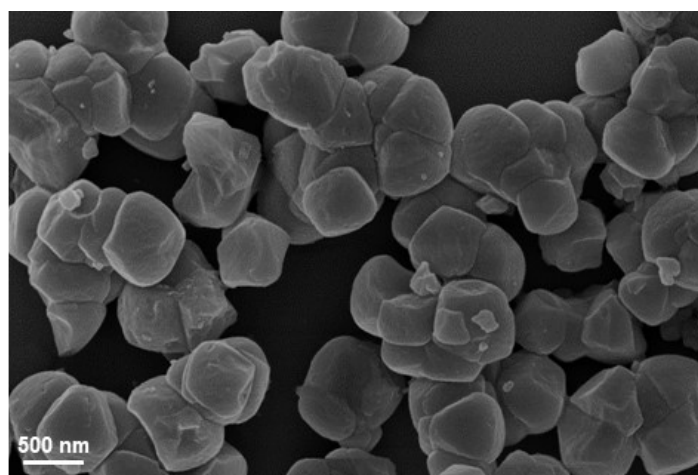

**Figure S4** SEM image of Ce-UiO-66.

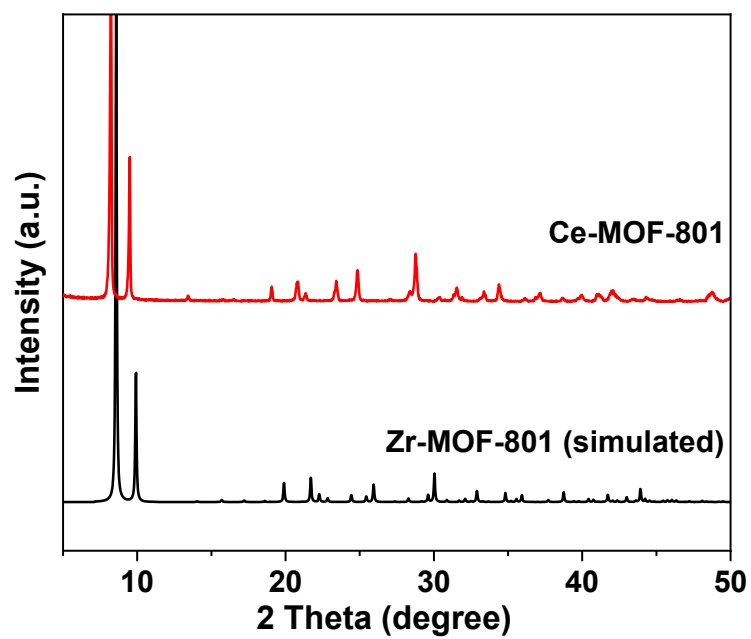

**Figure S5** XRD pattern of Ce-MOF-801.

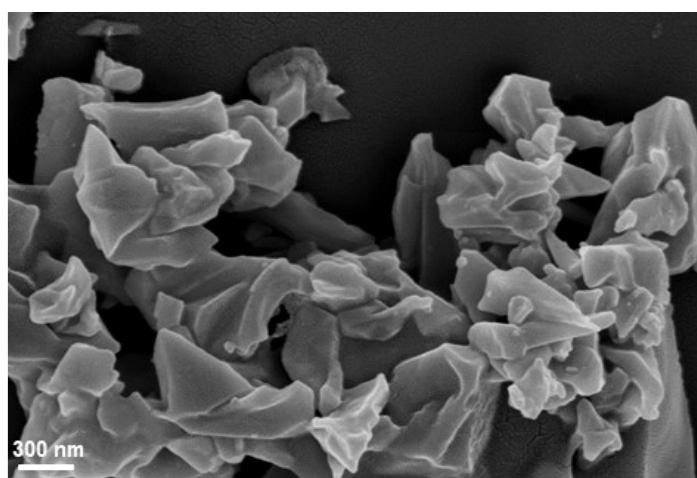

**Figure S6** SEM image of Ce-MOF-801.

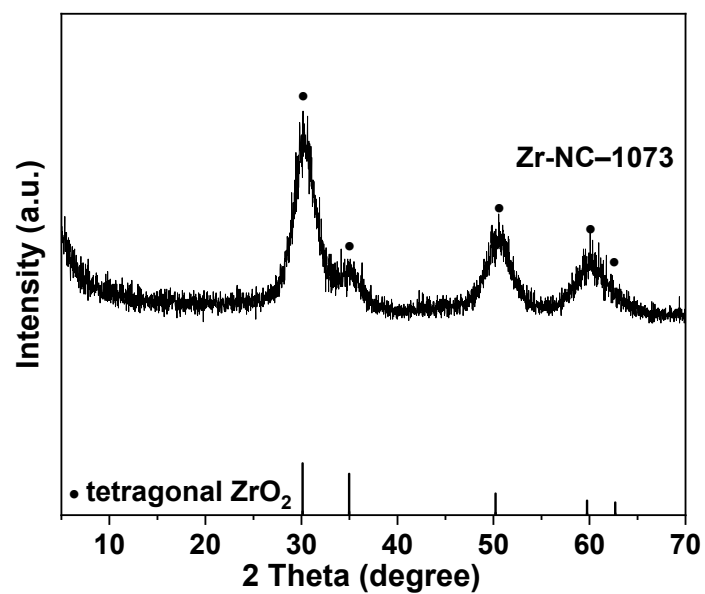

Figure S7 XRD pattern of Zr-NC-1073.

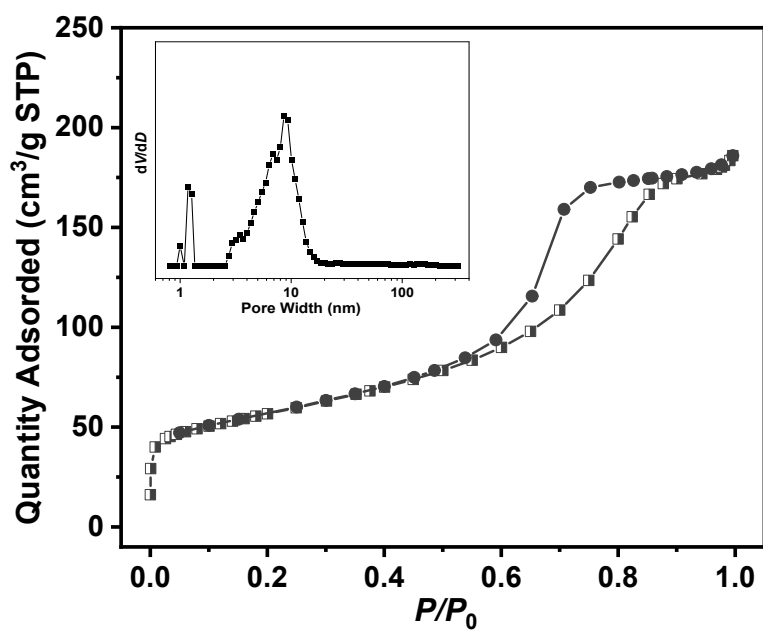

Figure S8 N<sub>2</sub> adsorption–desorption isotherms and the corresponding pore size distribution of Zr-NC-1073.

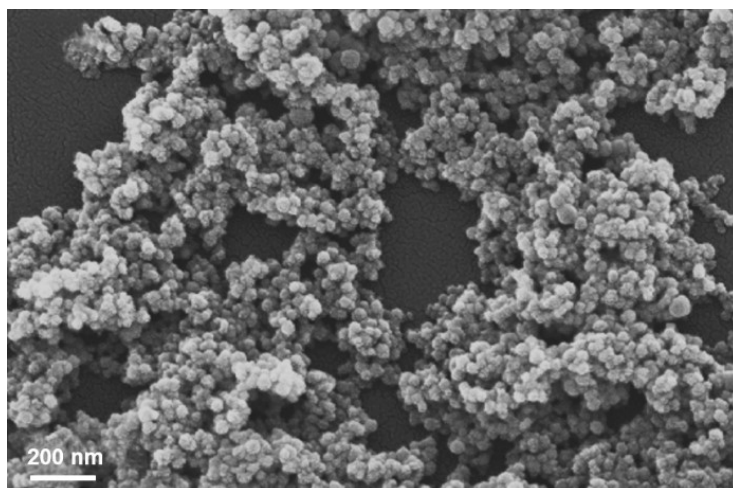

Figure S9 SEM image of Zr-NC-1073.

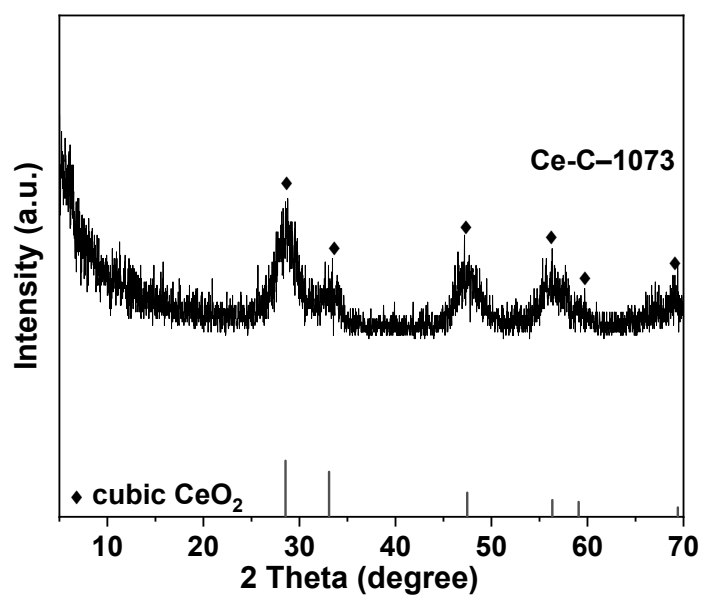

Figure S10 XRD pattern of Ce-C-1073.

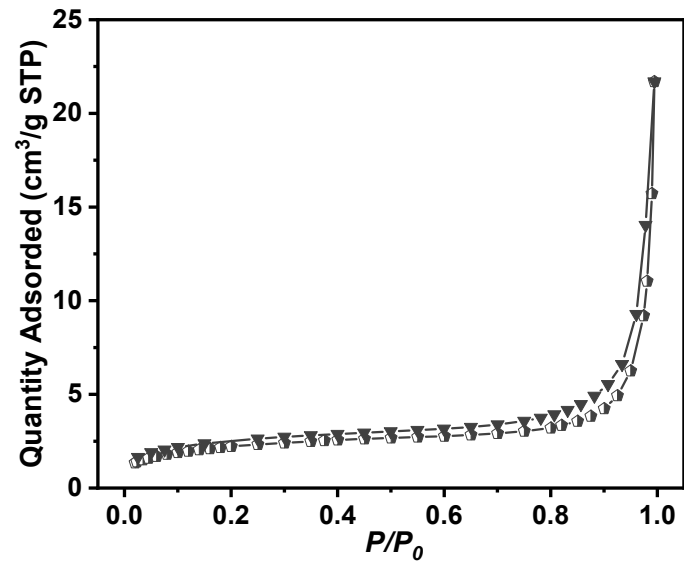

**Figure S11** N<sub>2</sub> adsorption–desorption isotherms of Ce–C–1073.

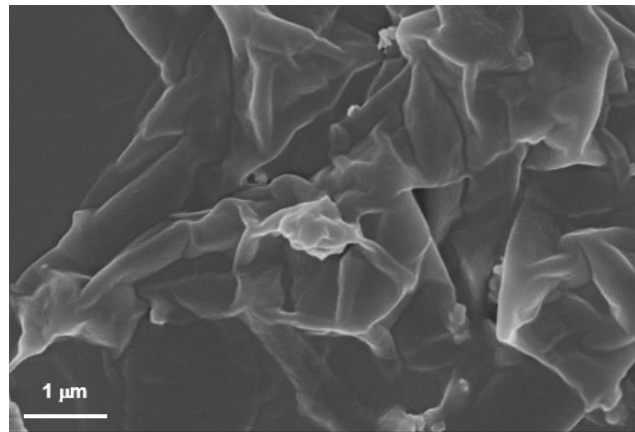

**Figure S12** SEM image of Ce–C–1073.



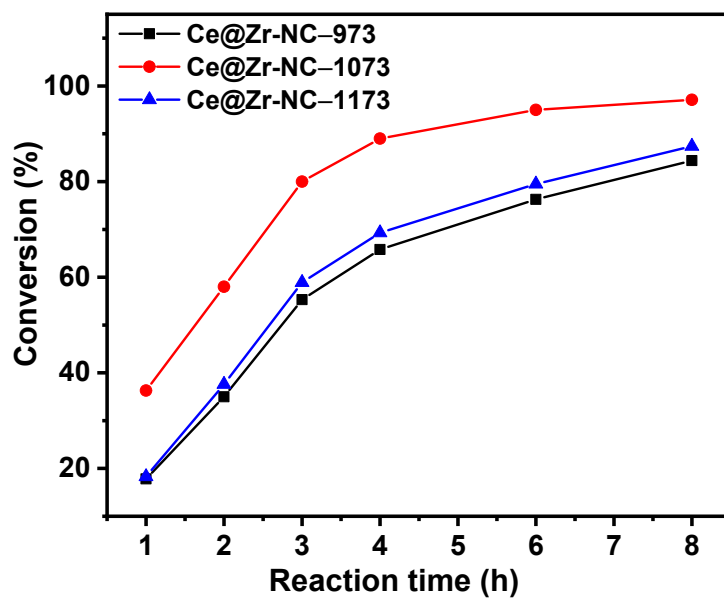

**Figure S13** Plot of conversion versus reaction time over CeZr-NC-T. Reaction conditions: 4-methoxybenzylamine (0.5 mmol), CeZr-NC-T (30 mg), *n*-decane (3 mL), O<sub>2</sub> (1 atm), 383 K.

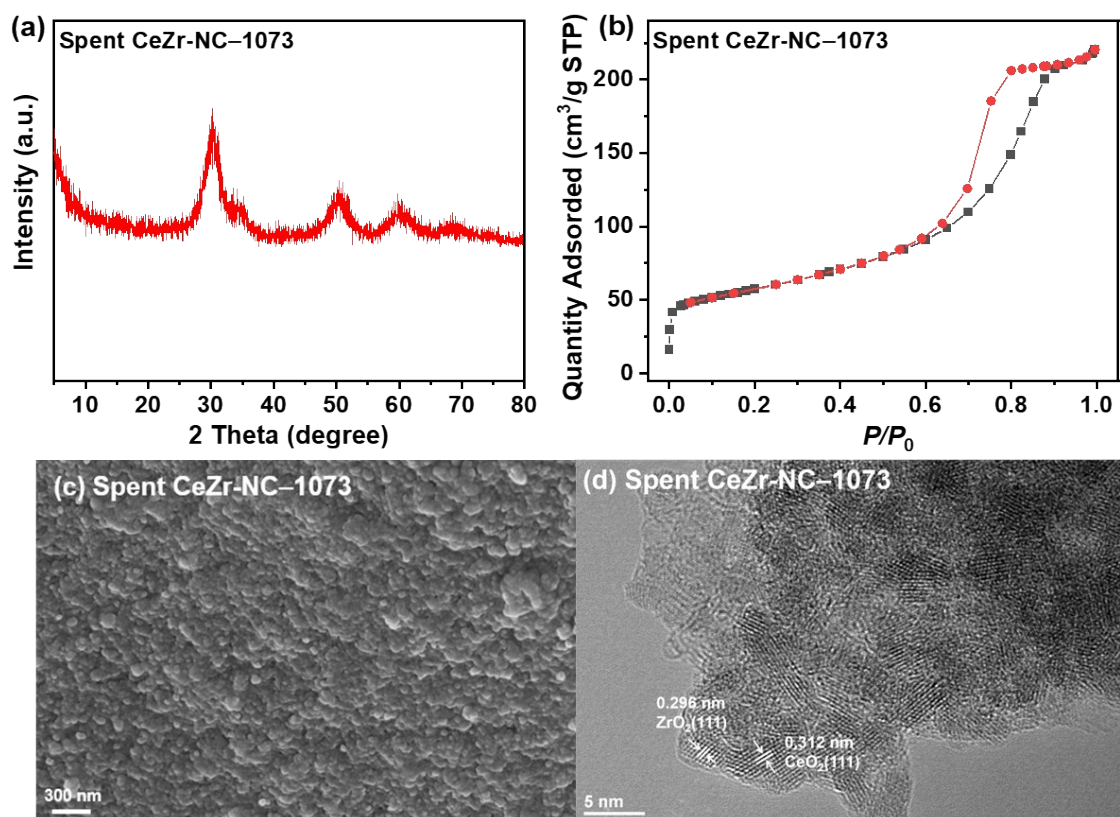

**Figure S14** (a) XRD pattern, (b) N<sub>2</sub> adsorption–desorption isotherms, (c) SEM, and (d) TEM of spent CeZr–NC–1073.

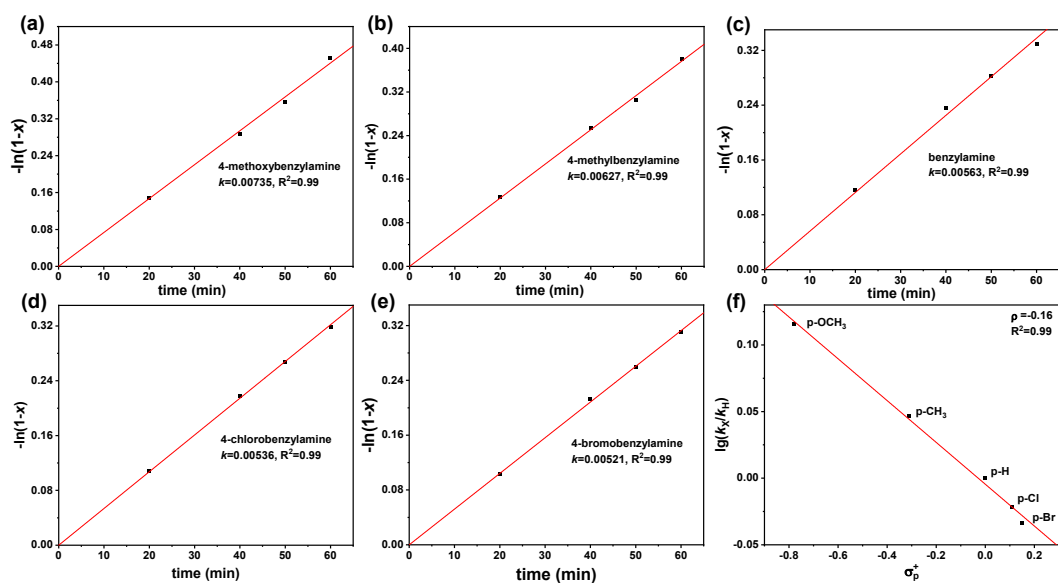

**Figure S15** (a)~(e) Plot of  $-\ln(1-x)$  versus reaction time for five substituted benzylamines. (f) Hammett plot for the self-coupling of *p*-substituted benzylamines over CeZr-NC-1073, and the  $\lg(k_x/k_H)$  was obtained from the ratio of the conversion with a reaction time of 1 h.  $\sigma^+$  is the Brown-Okamoto constant. **Reaction conditions:** substituted benzylamines (0.5 mmol), CeZr-NC-1073 (30 mg), *n*-decane (3 mL), O<sub>2</sub> (1 atm), 383 K.
